# Supplementary material for: Folic acid-functionalized mesoporous silica nanospheres hybridized with AIE luminogens for targeted cancer cell imaging
Source: Royal Society of Chemistry journal article supplement (doi:10.1039/c2nr33685e), 2013-01-01
Supplement: c2nr33685e.pdf [file c2nr33685e.pdf]

# Folic acid-functionalized Mesoporous Silica Nanospheres Hybridized with AIE Luminogens for targeted cancer cell imaging

## Supporting Information

### Table of Contents

**Fig. S1** MS spectrum of **3**

**Fig. S2** Particle size distribution of FFSNPs in aqueous media

**Fig. S3** Cell viability of HeLa cells after incubation with FFSNPs at various concentrations for 12, 24, and 48 h

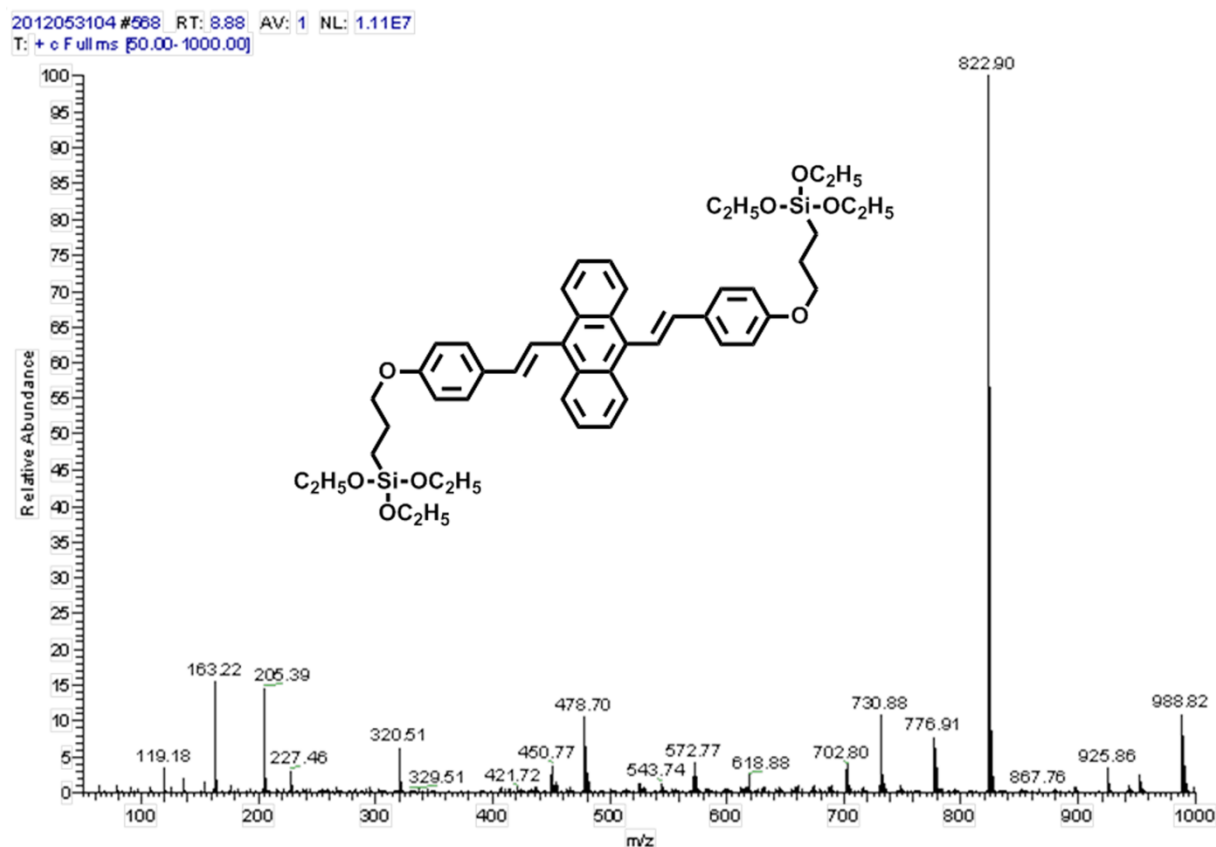

**Fig. S1** MS spectrum of **3**.

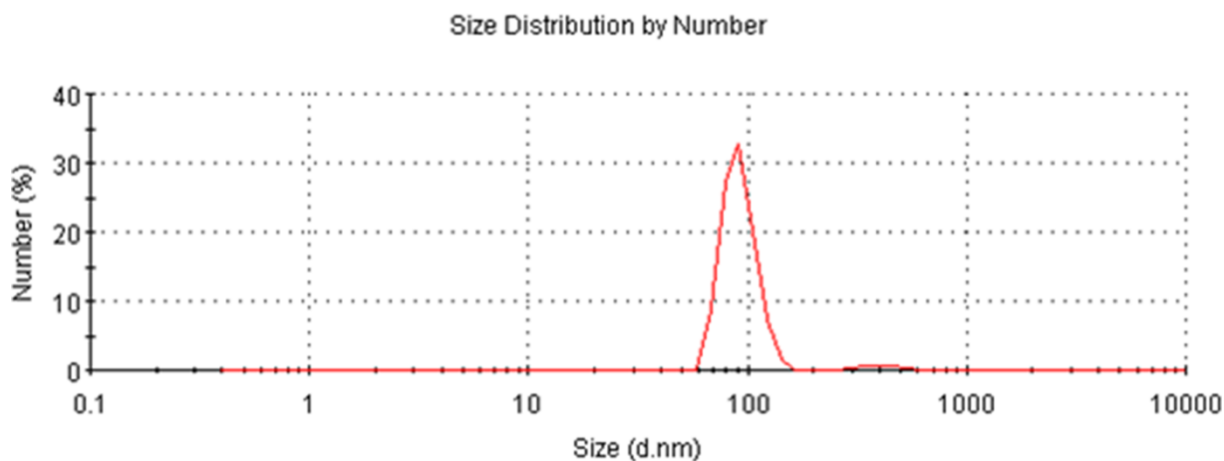

**Fig. S2** Particle size distribution of FFSNPs in aqueous media

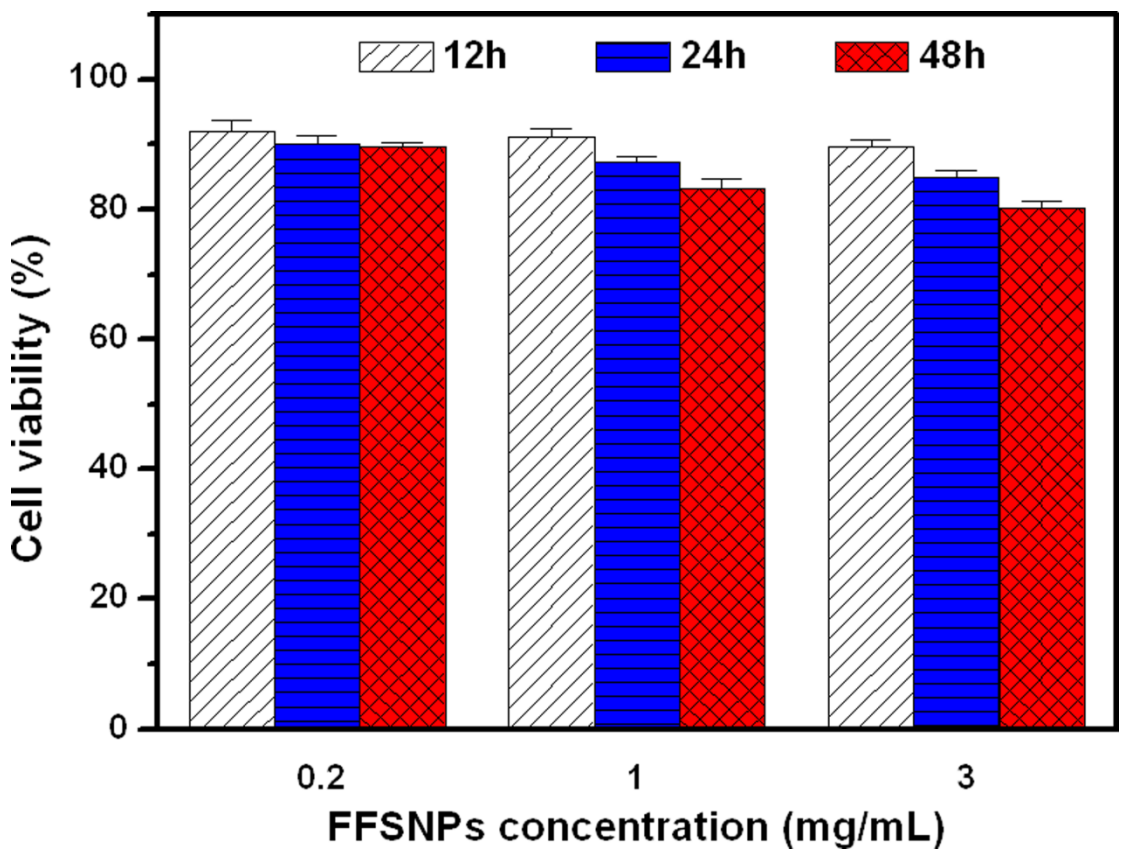

**Fig. S3** Cell viability of HeLa cells after incubation with FFSNPs at various concentrations for 12, 24, and 48 h
